# Supplementary material
Source: PubMed Central journal article supplement (PMC11006254)
Supplement: NIHMS1982422-supplement-Supplementary_Material.pdf [file NIHMS1982422-supplement-Supplementary_Material.pdf]

## Supplemental Information

Smart Discharges to improve post-discharge health outcomes in children

Page 1

### Followup Post Discharge Autopsy

|                                                                     |                                                                                                                                                                                                                                                                                             |
|---------------------------------------------------------------------|---------------------------------------------------------------------------------------------------------------------------------------------------------------------------------------------------------------------------------------------------------------------------------------------|
| Study ID                                                            | _____                                                                                                                                                                                                                                                                                       |
| Study ID                                                            | _____                                                                                                                                                                                                                                                                                       |
| Confirm study ID                                                    | _____                                                                                                                                                                                                                                                                                       |
| Latitude                                                            | _____                                                                                                                                                                                                                                                                                       |
| Longitude                                                           | _____                                                                                                                                                                                                                                                                                       |
| Altitude                                                            | _____                                                                                                                                                                                                                                                                                       |
| Post-discharge verbal autopsy date                                  | _____                                                                                                                                                                                                                                                                                       |
| Relationship of the person interviewed to the child                 | <input type="radio"/> Biological parent<br><input type="radio"/> Grandparent<br><input type="radio"/> Sibling<br><input type="radio"/> Aunt / uncle / cousin<br><input type="radio"/> Stepmother / stepfather<br><input type="radio"/> Care home / orphanage<br><input type="radio"/> Other |
| If 'other', please specify                                          | _____                                                                                                                                                                                                                                                                                       |
| Sex of the person being interviewed                                 | <input type="radio"/> Female<br><input type="radio"/> Male<br><input type="radio"/> N/A (in care)                                                                                                                                                                                           |
| Age of the person being interviewed                                 | <input type="radio"/> < = 18 years old<br><input type="radio"/> > 18 years old<br><input type="radio"/> > 50 years old<br><input type="radio"/> N/A (in care)                                                                                                                               |
| Is the person being interviewed the primary caregiver of the child? | <input type="radio"/> Yes<br><input type="radio"/> No                                                                                                                                                                                                                                       |
| Did the child suffer an injury or accident that led to death?       | <input type="radio"/> Yes<br><input type="radio"/> No<br><input type="radio"/> Unknown<br><input type="radio"/> Refused to answer                                                                                                                                                           |

03/25/2023 1:00pm

projectredcap.org

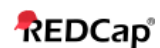

---

What kind of injury or accident did the child suffer from (select all that apply)?

- Road traffic crash or injury
- Poisoning
- Significant fall
- Burn or fire
- Drowning
- Homicide or abuse
- Bite or sting by venomous animal
- Other (specify)
- Don't know
- Refused to answer

---

If 'other', please specify

\_\_\_\_\_

---

Was the injury or accident intentionally inflicted by someone else?

- Yes
- No
- Unknown
- Refused to answer

---

How long did the illness that led to death last?

- Less than 24 hours
- 1 day
- 2 days
- 3 days
- 4 days
- 5 days
- 6 days
- 7 days
- 7-14 days
- 15-30 days
- More than 30 days
- Don't know
- Refused to answer

---

How old (in months) was the deceased at time of death?

\_\_\_\_\_

---

During the illness that led to death, did the child have a fever?

- Yes
- No
- Don't know

---

How long did the fever last?

- Less than 24 hours
- 1 day
- 2 days
- 3 days
- 4 days
- 5 days
- 6 days
- 7 days
- 7-14 days
- 15-30 days
- More than 30 days
- Don't know

---

Did the fever continue until death?

- Yes
- No
- Don't know

---

|                           |                                                                                                                                                            |
|---------------------------|------------------------------------------------------------------------------------------------------------------------------------------------------------|
| How severe was the fever? | <input type="radio"/> Mild < 38C<br><input type="radio"/> Moderate (38-39.5C)<br><input type="radio"/> Severe (>39.5C)<br><input type="radio"/> Don't know |
|---------------------------|------------------------------------------------------------------------------------------------------------------------------------------------------------|

---

|                                                                                                           |                                                                                           |
|-----------------------------------------------------------------------------------------------------------|-------------------------------------------------------------------------------------------|
| During the illness that led to death, did the child have more frequent loose or liquid stools than usual? | <input type="radio"/> Yes<br><input type="radio"/> No<br><input type="radio"/> Don't know |
|-----------------------------------------------------------------------------------------------------------|-------------------------------------------------------------------------------------------|

---

|                                                                                               |                                                                                                                                                                                                                                                                                             |
|-----------------------------------------------------------------------------------------------|---------------------------------------------------------------------------------------------------------------------------------------------------------------------------------------------------------------------------------------------------------------------------------------------|
| How many stools did the child have on the day that loose or liquid stools were most frequent? | <input type="radio"/> 1 stool<br><input type="radio"/> 2 stools<br><input type="radio"/> 3 stools<br><input type="radio"/> 4 stools<br><input type="radio"/> 5 stools<br><input type="radio"/> 5-10 stools<br><input type="radio"/> More than 10 stools<br><input type="radio"/> Don't know |
|-----------------------------------------------------------------------------------------------|---------------------------------------------------------------------------------------------------------------------------------------------------------------------------------------------------------------------------------------------------------------------------------------------|

---

|                                                               |                                                                                           |
|---------------------------------------------------------------|-------------------------------------------------------------------------------------------|
| Did the frequent loose or liquid stools continue until death? | <input type="radio"/> Yes<br><input type="radio"/> No<br><input type="radio"/> Don't know |
|---------------------------------------------------------------|-------------------------------------------------------------------------------------------|

---

|                                                                   |                                                                                           |
|-------------------------------------------------------------------|-------------------------------------------------------------------------------------------|
| During the illness that led to death, did the child have a cough? | <input type="radio"/> Yes<br><input type="radio"/> No<br><input type="radio"/> Don't know |
|-------------------------------------------------------------------|-------------------------------------------------------------------------------------------|

---

|                                       |                                                                                                                                                                                                                                                                                                                                                                                                                               |
|---------------------------------------|-------------------------------------------------------------------------------------------------------------------------------------------------------------------------------------------------------------------------------------------------------------------------------------------------------------------------------------------------------------------------------------------------------------------------------|
| For how many days did the cough last? | <input type="radio"/> Less than 24 hours<br><input type="radio"/> 1 day<br><input type="radio"/> 2 days<br><input type="radio"/> 3 days<br><input type="radio"/> 4 days<br><input type="radio"/> 5 days<br><input type="radio"/> 6 days<br><input type="radio"/> 7 days<br><input type="radio"/> 7-14 days<br><input type="radio"/> 15-30 days<br><input type="radio"/> More than 30 days<br><input type="radio"/> Don't know |
|---------------------------------------|-------------------------------------------------------------------------------------------------------------------------------------------------------------------------------------------------------------------------------------------------------------------------------------------------------------------------------------------------------------------------------------------------------------------------------|

---

|                            |                                                                                           |
|----------------------------|-------------------------------------------------------------------------------------------|
| Was the cough very severe? | <input type="radio"/> Yes<br><input type="radio"/> No<br><input type="radio"/> Don't know |
|----------------------------|-------------------------------------------------------------------------------------------|

---

|                                                                                |                                                                                           |
|--------------------------------------------------------------------------------|-------------------------------------------------------------------------------------------|
| During the illness that led to death, did the child have difficulty breathing? | <input type="radio"/> Yes<br><input type="radio"/> No<br><input type="radio"/> Don't know |
|--------------------------------------------------------------------------------|-------------------------------------------------------------------------------------------|

---

|                                                      |                                                                                                                                                                                                                                                                                                                                                                                                                               |
|------------------------------------------------------|-------------------------------------------------------------------------------------------------------------------------------------------------------------------------------------------------------------------------------------------------------------------------------------------------------------------------------------------------------------------------------------------------------------------------------|
| For how many days did the difficulty breathing last? | <input type="radio"/> Less than 24 hours<br><input type="radio"/> 1 day<br><input type="radio"/> 2 days<br><input type="radio"/> 3 days<br><input type="radio"/> 4 days<br><input type="radio"/> 5 days<br><input type="radio"/> 6 days<br><input type="radio"/> 7 days<br><input type="radio"/> 7-14 days<br><input type="radio"/> 15-30 days<br><input type="radio"/> More than 30 days<br><input type="radio"/> Don't know |
|------------------------------------------------------|-------------------------------------------------------------------------------------------------------------------------------------------------------------------------------------------------------------------------------------------------------------------------------------------------------------------------------------------------------------------------------------------------------------------------------|

03/25/2023 1:00pm

projectredcap.org

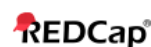

---

|                                                                          |                                                                                           |
|--------------------------------------------------------------------------|-------------------------------------------------------------------------------------------|
| During the illness that led to death, did the child have fast breathing? | <input type="radio"/> Yes<br><input type="radio"/> No<br><input type="radio"/> Don't know |
|--------------------------------------------------------------------------|-------------------------------------------------------------------------------------------|

---

|                                                |                                                                                                                                                                                                                                                                                                                                                                                                                               |
|------------------------------------------------|-------------------------------------------------------------------------------------------------------------------------------------------------------------------------------------------------------------------------------------------------------------------------------------------------------------------------------------------------------------------------------------------------------------------------------|
| For how many days did the fast breathing last? | <input type="radio"/> Less than 24 hours<br><input type="radio"/> 1 day<br><input type="radio"/> 2 days<br><input type="radio"/> 3 days<br><input type="radio"/> 4 days<br><input type="radio"/> 5 days<br><input type="radio"/> 6 days<br><input type="radio"/> 7 days<br><input type="radio"/> 7-14 days<br><input type="radio"/> 15-30 days<br><input type="radio"/> More than 30 days<br><input type="radio"/> Don't know |
|------------------------------------------------|-------------------------------------------------------------------------------------------------------------------------------------------------------------------------------------------------------------------------------------------------------------------------------------------------------------------------------------------------------------------------------------------------------------------------------|

---

|                                                                                  |                                                                                           |
|----------------------------------------------------------------------------------|-------------------------------------------------------------------------------------------|
| During the illness that led to death, did the child have indrawing of the chest? | <input type="radio"/> Yes<br><input type="radio"/> No<br><input type="radio"/> Don't know |
|----------------------------------------------------------------------------------|-------------------------------------------------------------------------------------------|

---

|                                                                                      |                                                                                           |
|--------------------------------------------------------------------------------------|-------------------------------------------------------------------------------------------|
| During the illness that led to death, did the child's breathing sound like grunting? | <input type="radio"/> Yes<br><input type="radio"/> No<br><input type="radio"/> Don't know |
|--------------------------------------------------------------------------------------|-------------------------------------------------------------------------------------------|

---

|                                                                                                    |                                                                                           |
|----------------------------------------------------------------------------------------------------|-------------------------------------------------------------------------------------------|
| Did the child experience any generalized convulsions or fits during the illness that led to death? | <input type="radio"/> Yes<br><input type="radio"/> No<br><input type="radio"/> Don't know |
|----------------------------------------------------------------------------------------------------|-------------------------------------------------------------------------------------------|

---

|                                                                 |                                                                                           |
|-----------------------------------------------------------------|-------------------------------------------------------------------------------------------|
| Was the child unconscious during the illness that led to death? | <input type="radio"/> Yes<br><input type="radio"/> No<br><input type="radio"/> Don't know |
|-----------------------------------------------------------------|-------------------------------------------------------------------------------------------|

---

|                                                  |                                                                                                                                                           |
|--------------------------------------------------|-----------------------------------------------------------------------------------------------------------------------------------------------------------|
| How long before death did unconsciousness start? | <input type="radio"/> Less than 6 hours<br><input type="radio"/> 6-23 hours<br><input type="radio"/> 24 hours or more<br><input type="radio"/> Don't know |
|--------------------------------------------------|-----------------------------------------------------------------------------------------------------------------------------------------------------------|

---

|                                                                       |                                                                                           |
|-----------------------------------------------------------------------|-------------------------------------------------------------------------------------------|
| Did the child have a stiff neck during the illness that led to death? | <input type="radio"/> Yes<br><input type="radio"/> No<br><input type="radio"/> Don't know |
|-----------------------------------------------------------------------|-------------------------------------------------------------------------------------------|

---

|                                                                               |                                                                                           |
|-------------------------------------------------------------------------------|-------------------------------------------------------------------------------------------|
| Did the child have a bulging fontanelle during the illness that led to death? | <input type="radio"/> Yes<br><input type="radio"/> No<br><input type="radio"/> Don't know |
|-------------------------------------------------------------------------------|-------------------------------------------------------------------------------------------|

---

|                                                                      |                                                                                           |
|----------------------------------------------------------------------|-------------------------------------------------------------------------------------------|
| During the month before he/she died, did the child have a skin rash? | <input type="radio"/> Yes<br><input type="radio"/> No<br><input type="radio"/> Don't know |
|----------------------------------------------------------------------|-------------------------------------------------------------------------------------------|

---

How many days did the rash last?

- Less than 24 hours
- 1 day
- 2 days
- 3 days
- 4 days
- 5 days
- 6 days
- 7 days
- 7-14 days
- 15-30 days
- Don't know

---

During the illness that led to death, did the child's skin flake off in patches?

- Yes
- No
- Don't know

---

Did the child's hair change in color to a reddish or yellowish color?

- Yes
- No
- Don't know

---

Did the child have a protruding belly?

- Yes
- No
- Don't know

---

During the illness that led to death, did the child suffer from anemia or pallor?

- Yes
- No
- Don't know

---

During the illness that led to death, did the child have swelling in the armpits?

- Yes
- No
- Don't know

---

During the illness that led to death, did the child bleed from anywhere?

- Yes
- No
- Don't know

---

During the illness that led to death, did the child have areas of the skin that turned black?

- Yes
- No
- Don't know

---

Is the cause of death known or recorded?

- Yes
- No
- Don't know

---

What was the cause of death?

\_\_\_\_\_

---

Was a death certificate issued?

- Yes
- No
- Don't know

---

Is the death certificate available?

- Yes
- No
- Don't know

---

Record the immediate cause of death from the certificate

\_\_\_\_\_

---

Record the other underlying causes of death from the certificate

---

---

Comments

---

---

Comments

---
